# Supplementary material for: A green and facile approach for the synthesis of water-dispersible reduced graphene oxide based on ionic liquids
Source: Royal Society of Chemistry journal article supplement (doi:10.1039/c3cc48652d), 2013-12-16
Supplement: c3cc48652d.pdf [file c3cc48652d.pdf]

## Supplementary Information

### A Green and Facile Approach for Synthesis of Water-Dispersible

#### Reduced Graphene Oxide Based on the Ionic Liquids

TongpingZhang, Ping Liu, Chunrui Sheng, YongxinDuan,\*and JianmingZhang\*

*Key Laboratory of Rubber-Plastics, Ministry of Education/*

*Shandong Provincial Key Laboratory of Rubber-plastics, Qingdao University of  
Science & Technology, Qingdao City 266042, People's Republic of China.*

\*Corresponding authors. E-mail: [zjm@qust.edu.cn](mailto:zjm@qust.edu.cn); [dyx@qust.edu.cn](mailto:dyx@qust.edu.cn)

#### Morphology of IRGO/cellulose aerogel characterized by SEM.

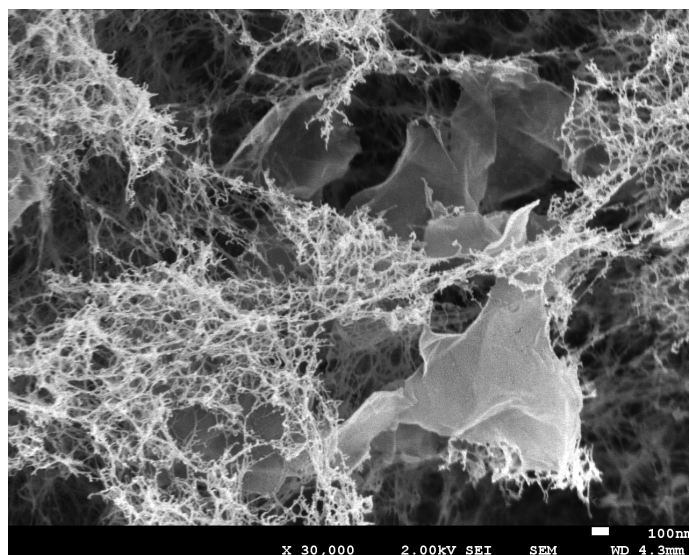

Fig. S1 Field-emission image of IRGO/cellulose aerogel, which shows the dispersed morphology of IRGO sheet in regenerated network of cellulose fibers.

For preparing the IRGO/cellulose nanocomposite, the cellulose was homogenous mixture with IRGO in ILs at 80 °C. Then the hydrogel was obtained by regenerating the composite in water. By freeze-drying technique, the aerogel of IRGO/cellulose nanocomposite was formed. Fig.S1 shows that IRGO dispersed very well in the regenerated network of cellulose fibers and it exfoliated to graphene sheets with folding morphology. The results demonstrate that the stable IRGO/ILs solution could be used to prepare the RGO/cellulose nanocomposite.
